# Supplementary material for: Antibody-Drug Conjugate Using Ionized Cys-Linker-MMAE as the Potent Payload Shows Optimal Therapeutic Safety
Source: Cancers (Basel). 2020 Mar 21;12(3):744. doi: 10.3390/cancers12030744 (PMC7140114; doi:10.3390/cancers12030744)
Supplement: Supplementary file 1 [file cancers-12-00744-s001.pdf]

Article

# Antibody-Drug Conjugate Using Ionized Cys-Linker-MMAE as the Potent Payload Shows Optimal Therapeutic Safety

Yanming Wang, Lianqi Liu, Shiyong Fan, Dian Xiao, Fei Xie, Wei Li, Wu Zhong and Xinbo Zhou

## Supplementary Materials

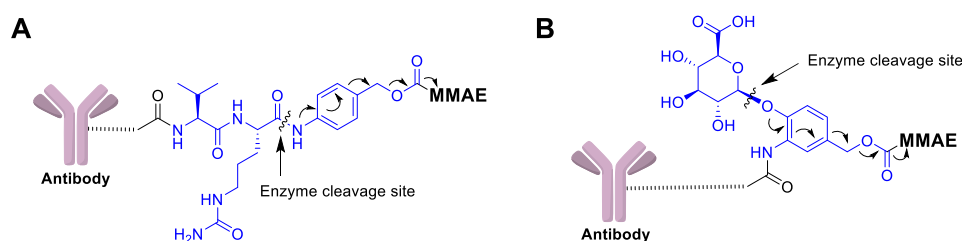

**Figure S1.** Structures of cleavable linker systems for current MMAE-based ADCs. (A) Structure of the cathepsin B-cleavable ADCs and its drug release pattern. (B) Structure of the β-glucuronidase-cleavable ADCs and its drug release pattern.

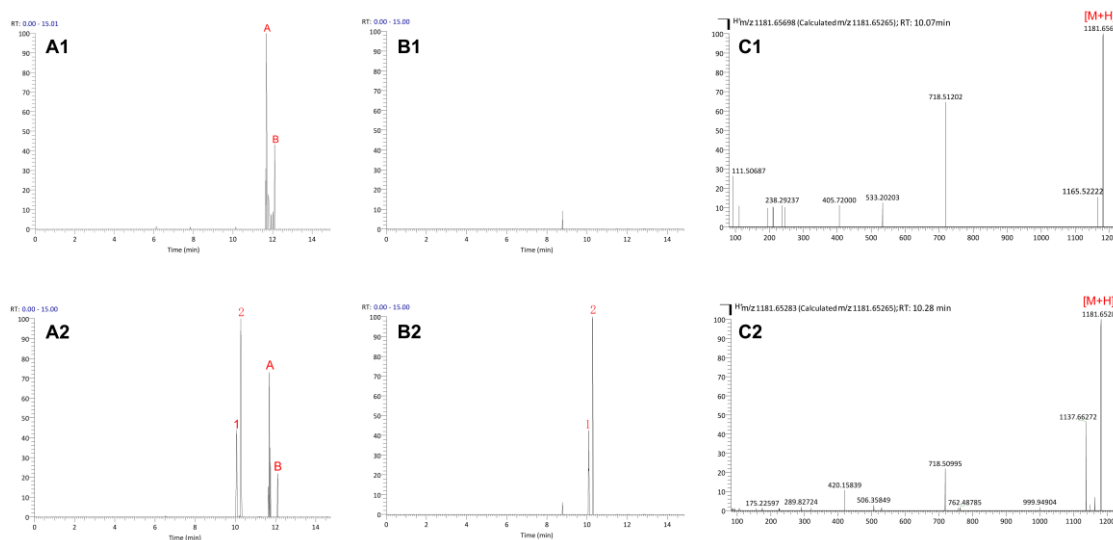

**Figure S2.** Drug release study of the Cys-linker-MMAE-based ADC at the cellular level. (A1) The XIC of full MS/ddMS2 scan of the vehicle in BT-474 cells; (A2) The XIC of full MS/ddMS2 scan of the metabolites in BT-474 cells; (B1) The XIC of full MS/ddMS2 scan of the vehicle in NCI-N87 cells; (B2) The XIC of full MS/ddMS2 scan of the metabolites in NCI-N87 cells; (C1) The MS2 fragmentation of M1 (R.T. = 10.07 min); (C2) The MS2 fragmentation of M2 (R.T. = 10.28 min). The compound A (m/z 591.32976, R.T.=11.69 min) and B (m/z 591.32976, R.T = 12.11 min) could also be detected in the control group of BT-474 cells (Figure A1 and A2), meaning that they are not related to the ADC being administered. Each dosing group included two replicates. R.T.: retention time.

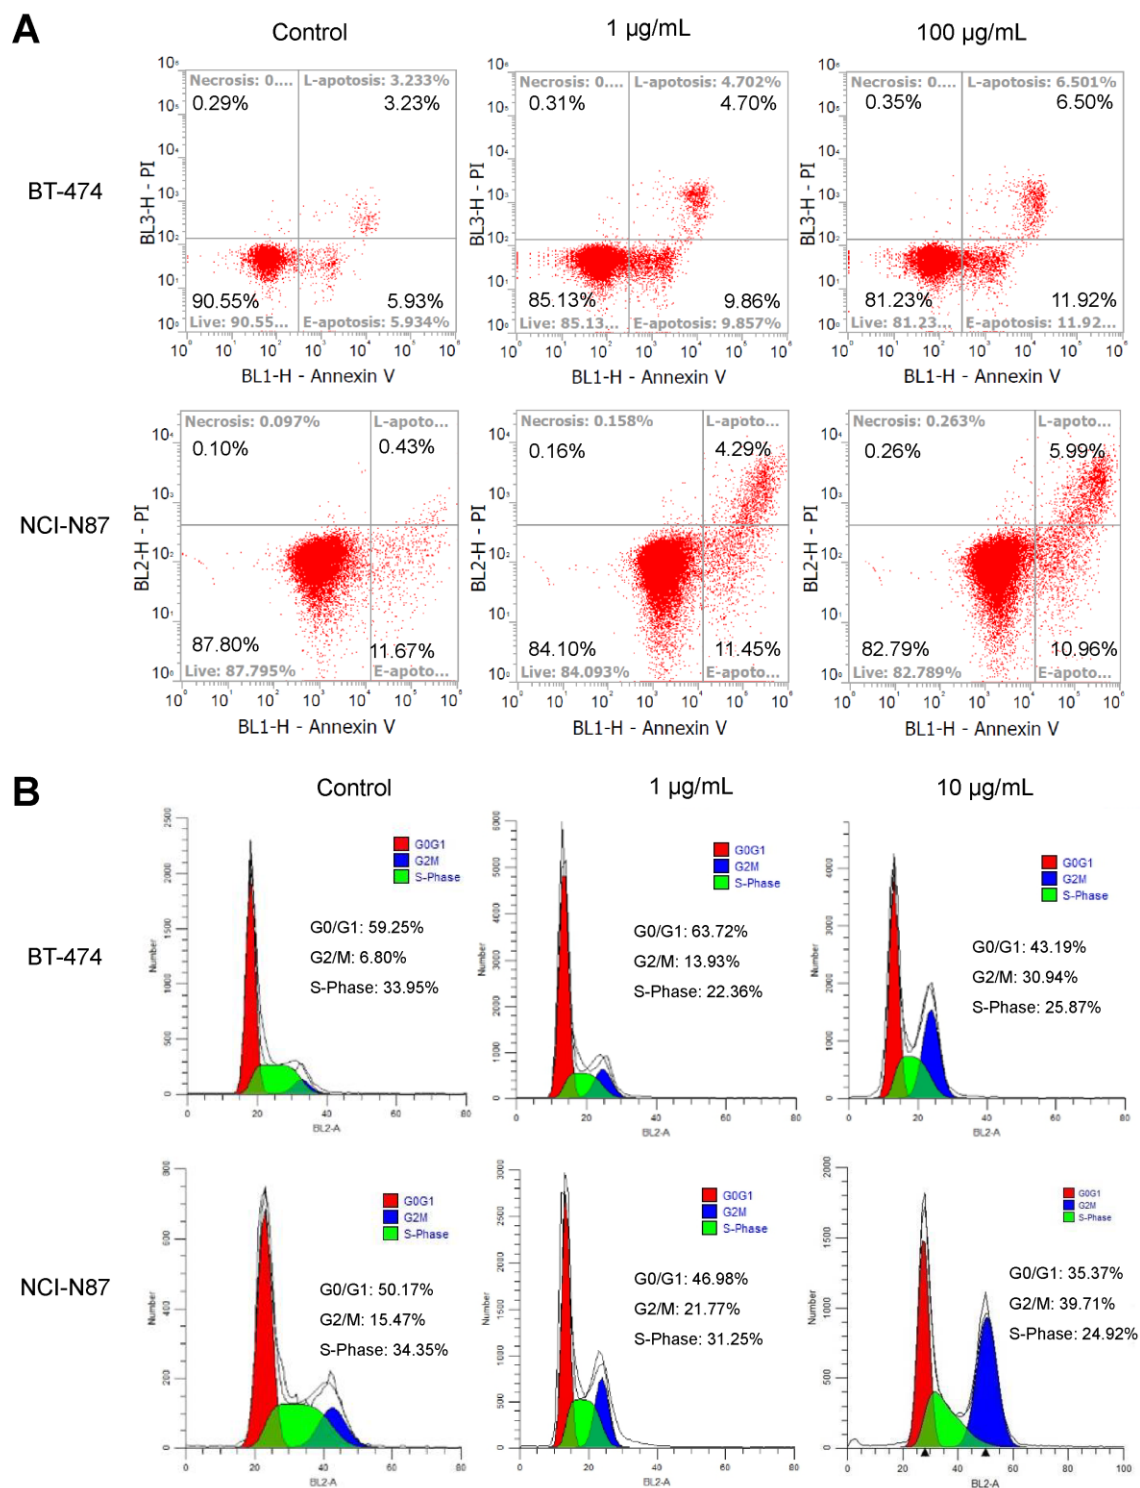

**Figure S3.** Flow cytometry for apoptosis and cell cycle arrest analysis. **(A)** The induction of apoptosis in BT-474 and NCI-N87 cells was detected by flow cytometry; the cells were treated with mil40-15 for 24 h. **(B)** Cell cycle arrest analysis in the BT-474 and NCI-N87 cells was detected by flow cytometry; the cells were treated with mil40-15 for 24 h.

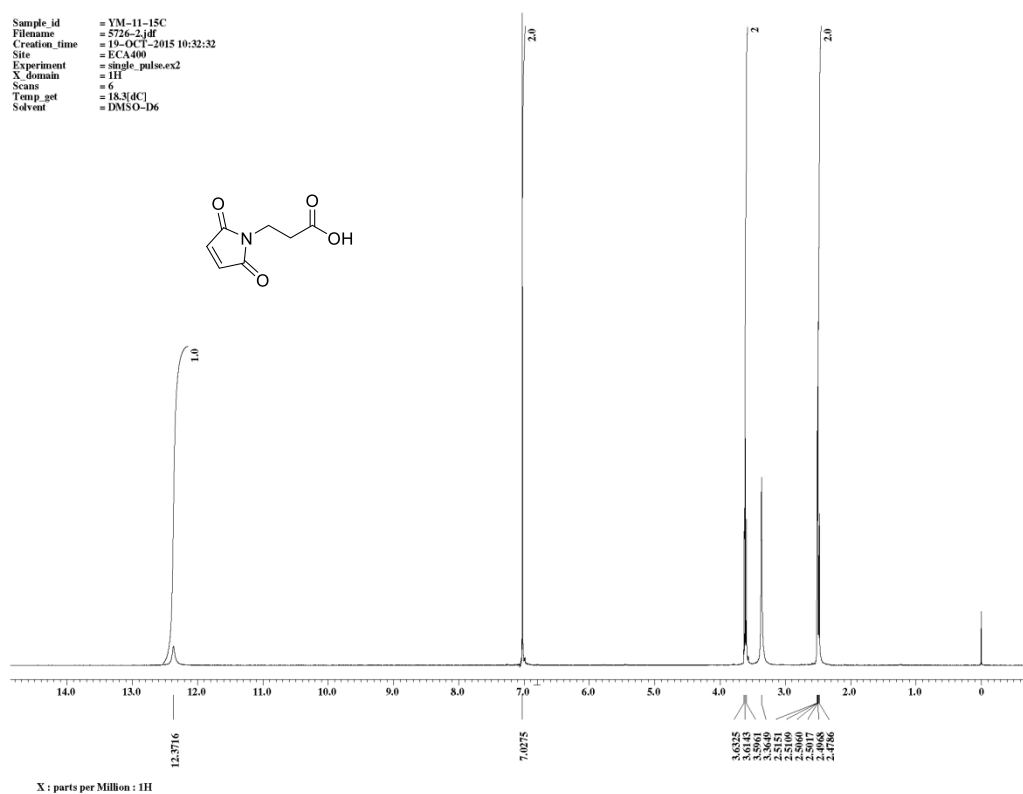Figure S4. The  $^1\text{H}$ -NMR spectrum of compound 4.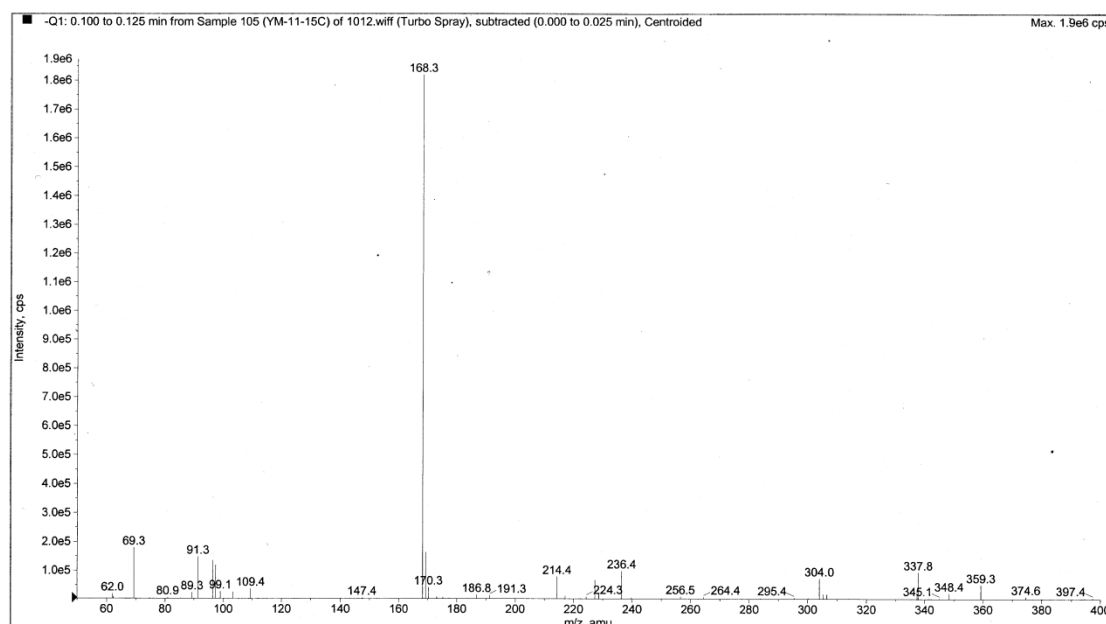

Figure S5. The ESI-MS spectrum of compound 4.

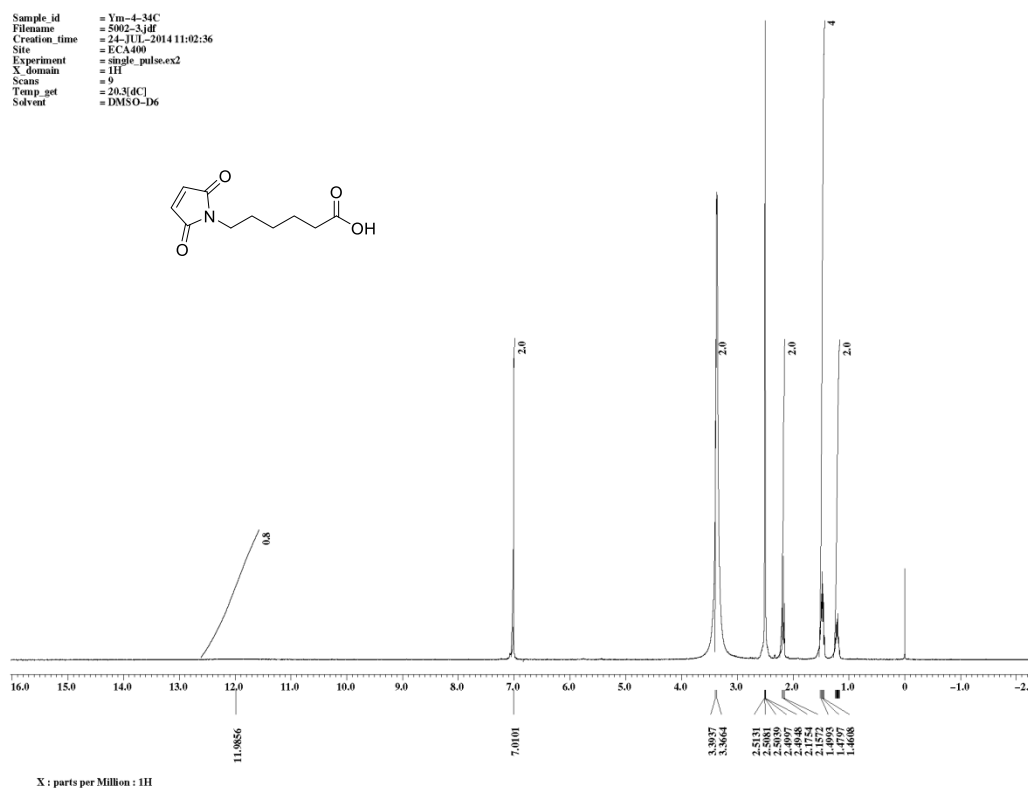Figure S6. The  $^1\text{H}$ -NMR spectrum of compound 5.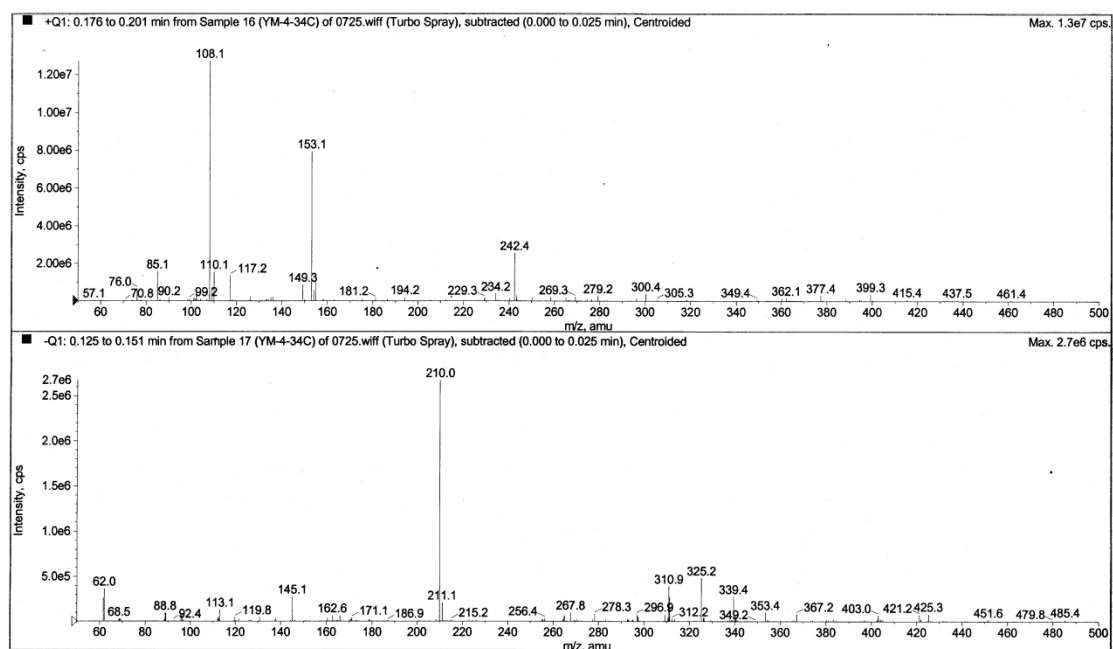

Figure S7. The ESI-MS spectrum of compound 5.

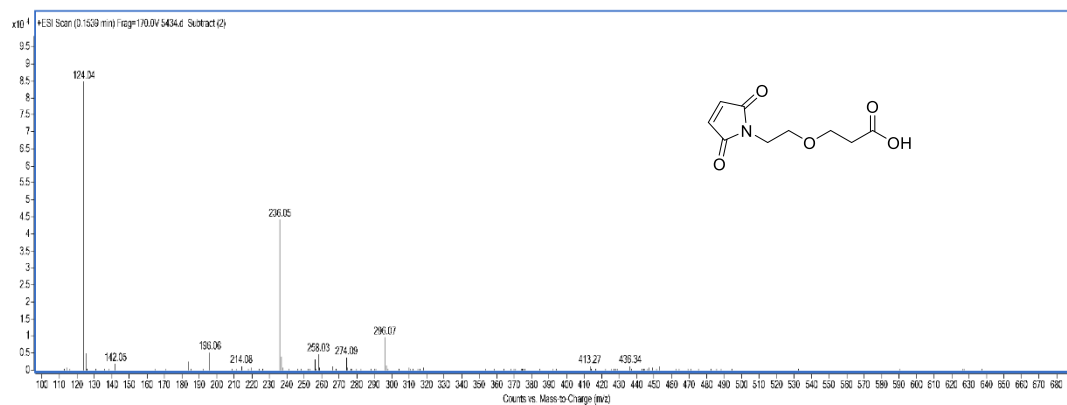

Figure S8. The ESI-MS spectrum of compound 6.

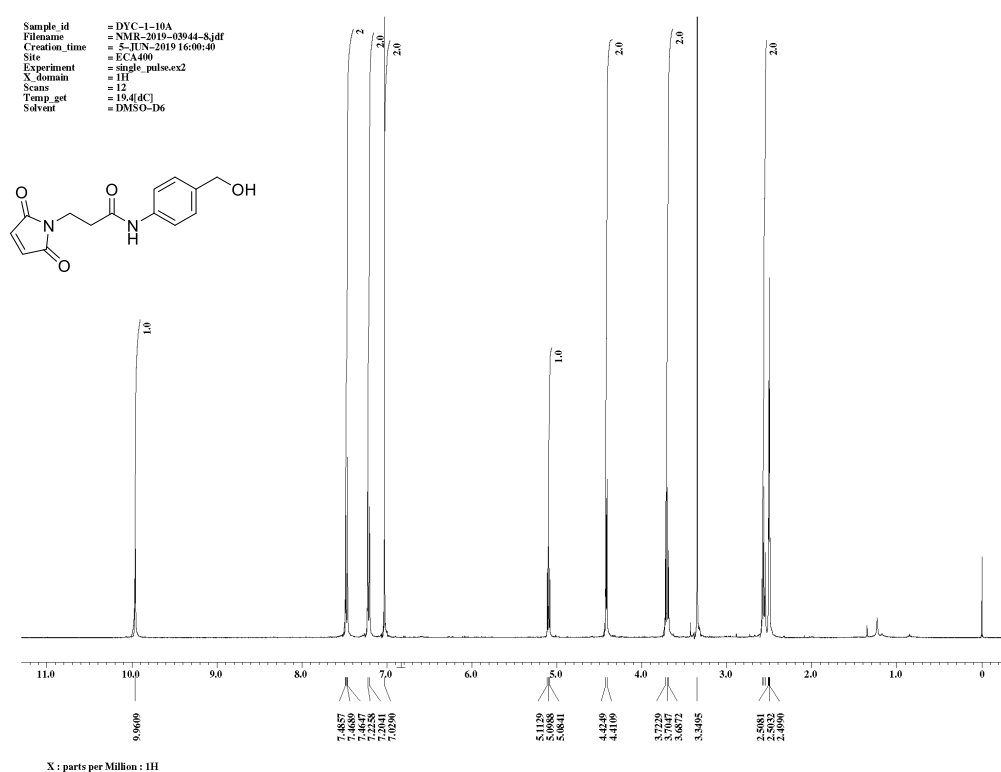Figure S9. The  $^1\text{H}$ -NMR spectrum of compound 7.

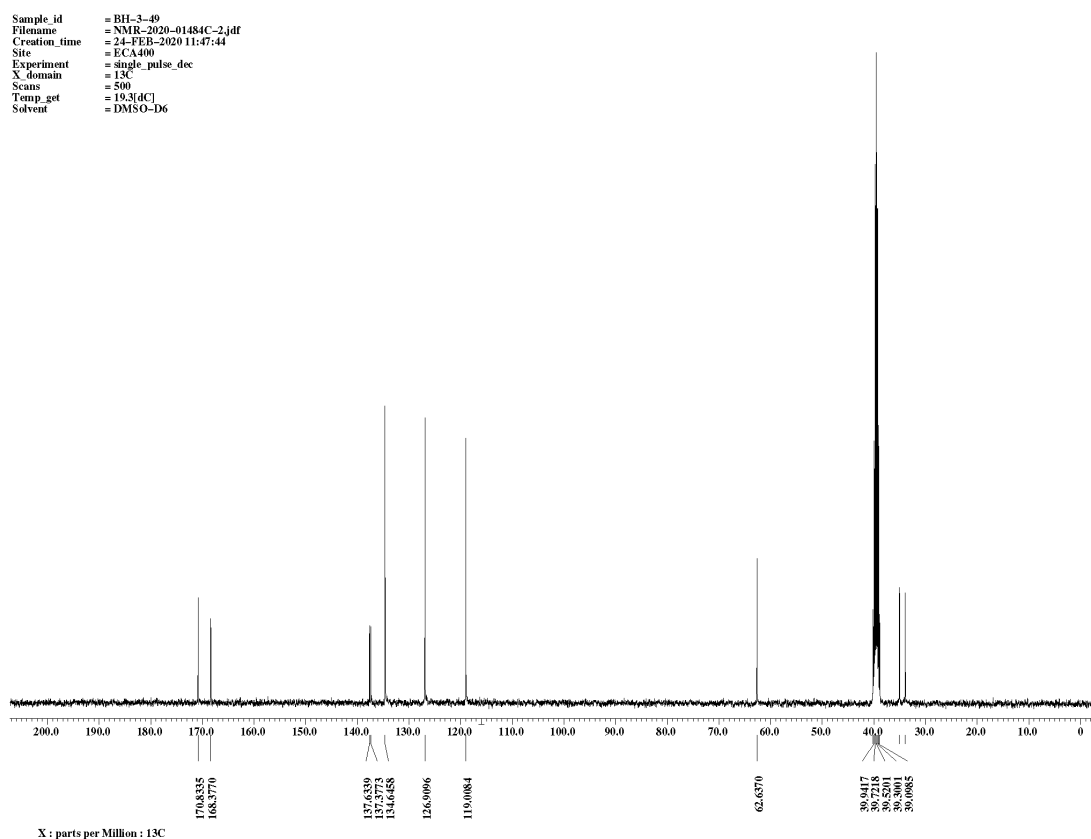

Figure S10. The  $^{13}\text{C}$ -NMR spectrum of compound 7.

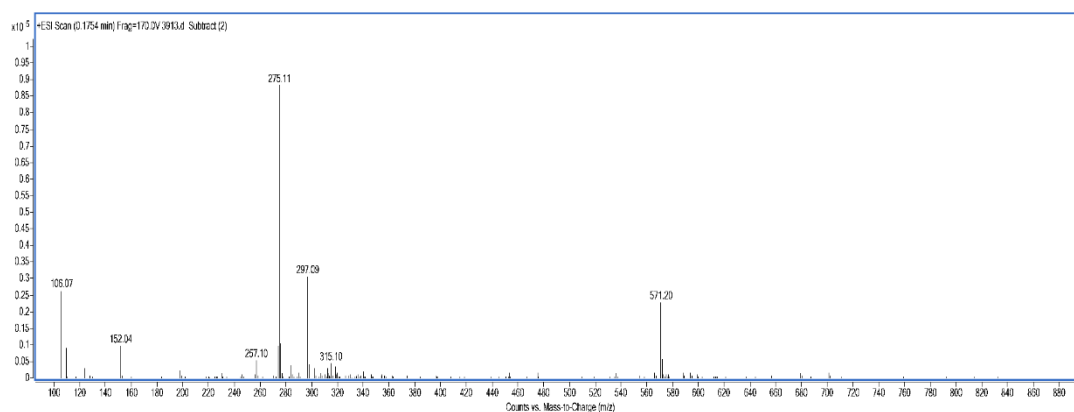

Figure S11. The ESI-MS spectrum of compound 7.

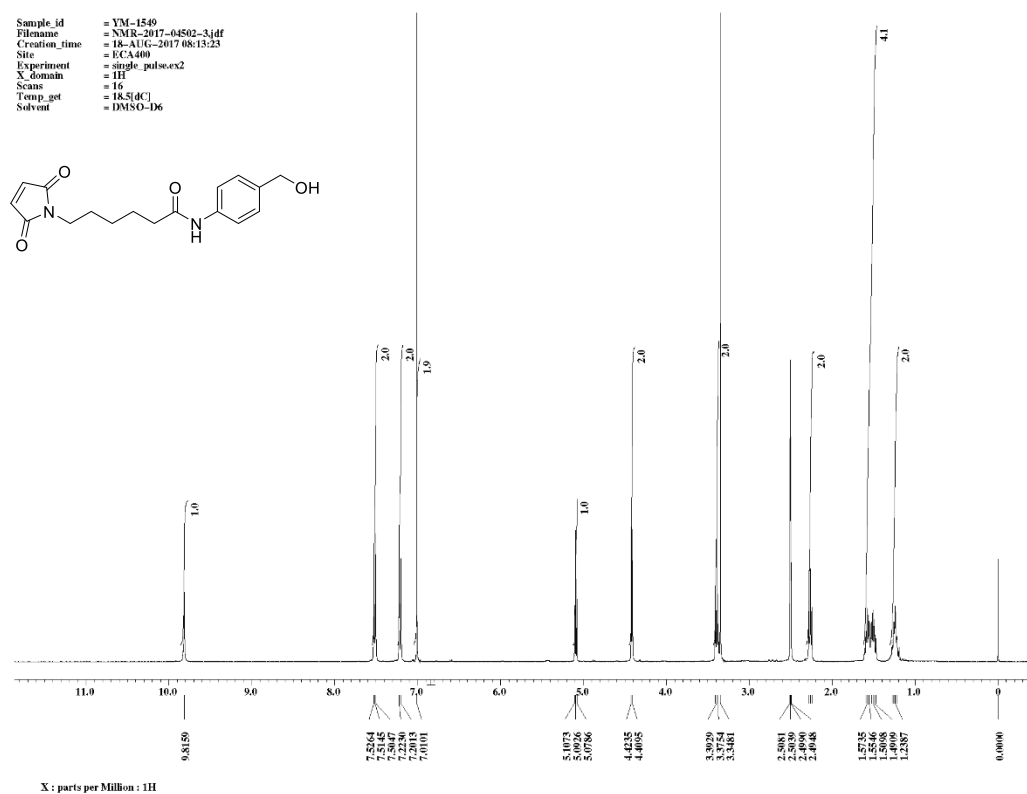Figure S12. The <sup>1</sup>H-NMR spectrum of compound 8.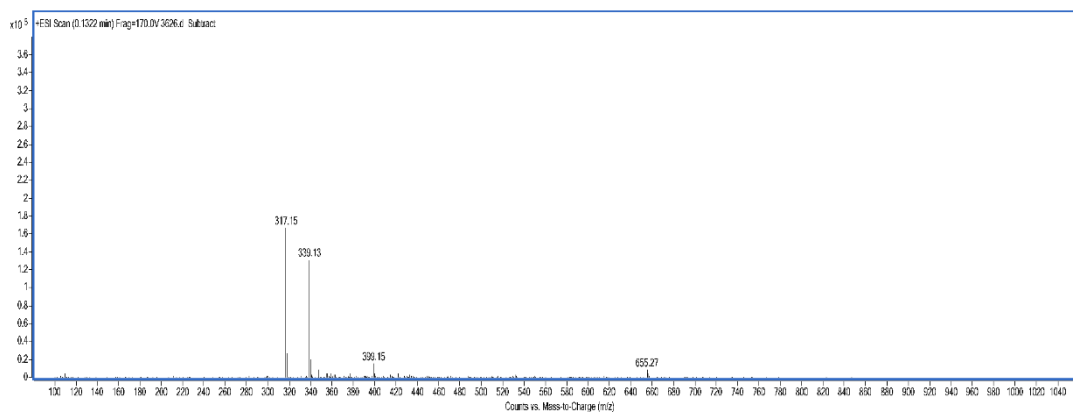

Figure S13. The ESI-MS spectrum of compound 8.

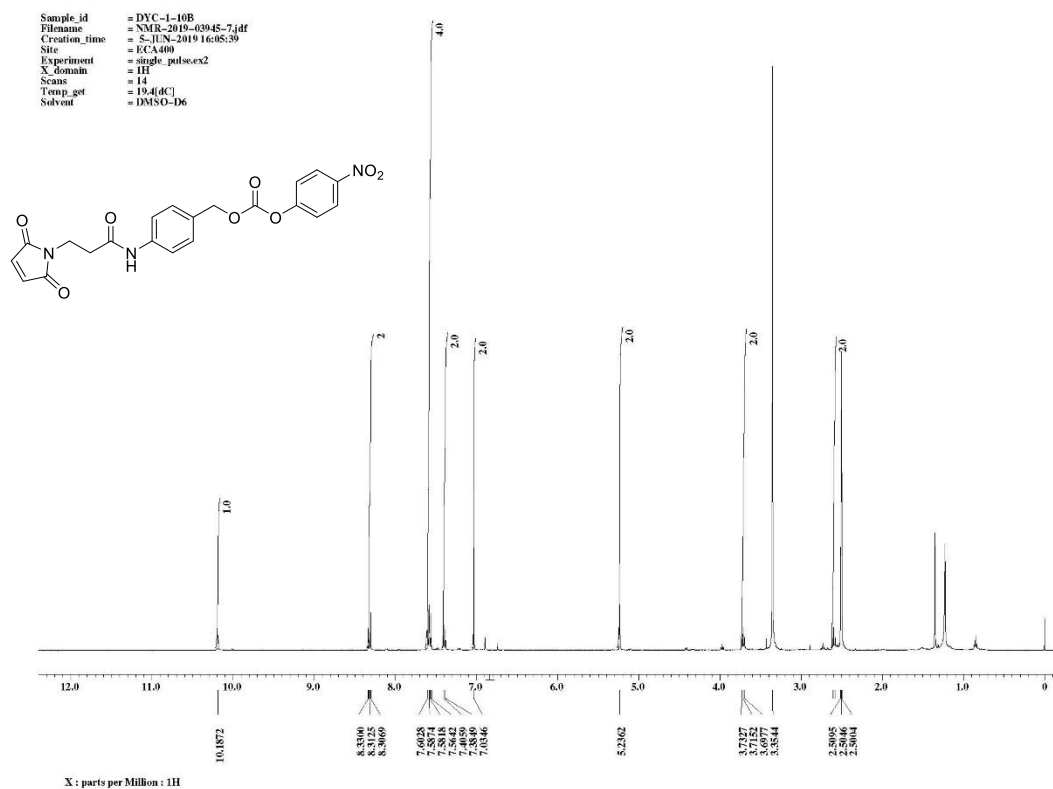Figure S14. The  $^1\text{H}$ -NMR spectrum of compound 9.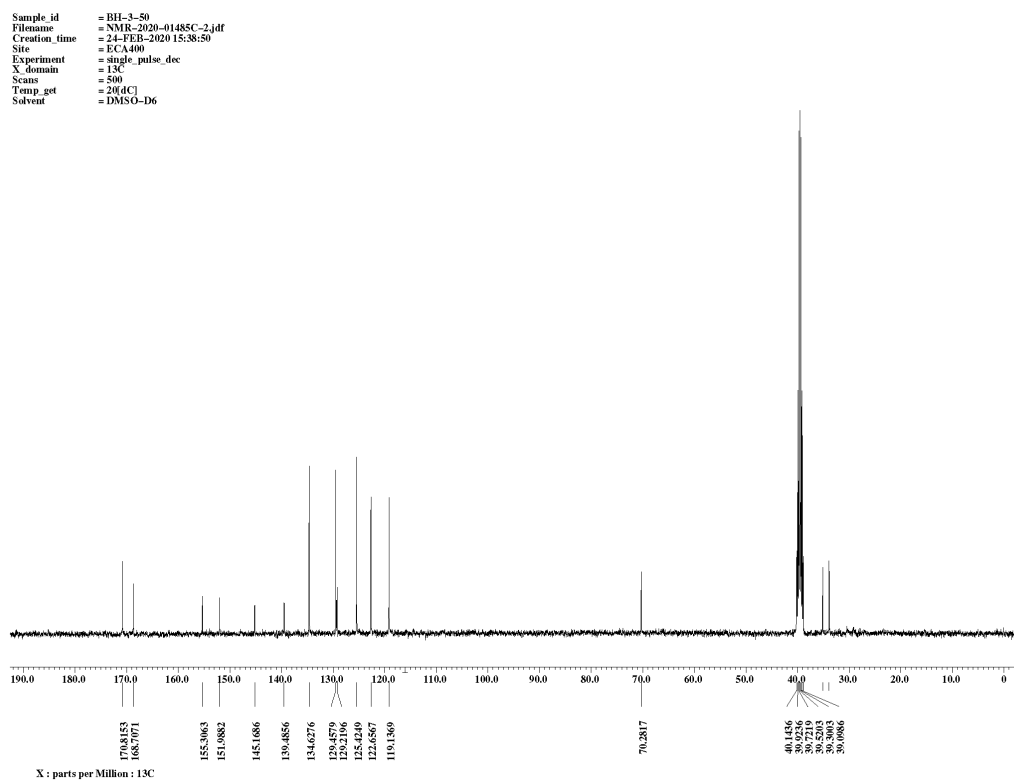Figure S15. The  $^{13}\text{C}$ -NMR spectrum of compound 9.

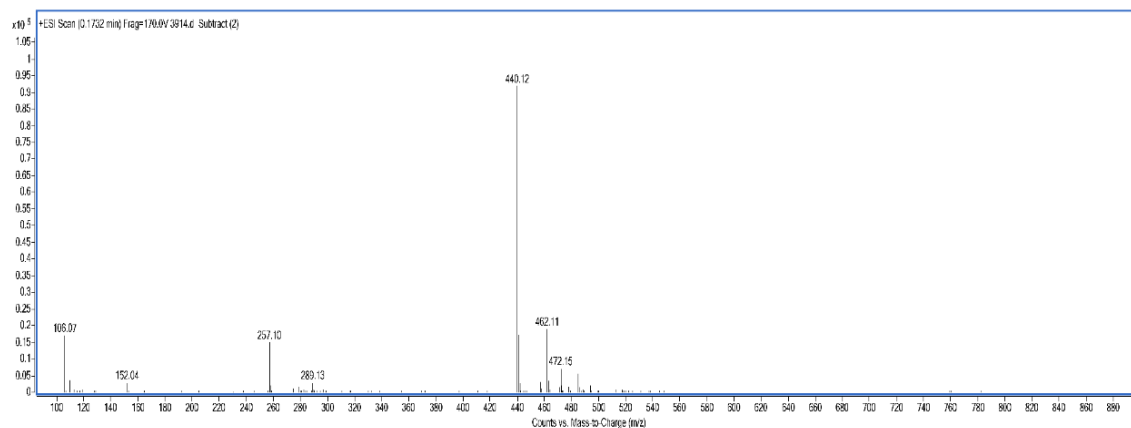

Figure S16. The ESI-MS spectrum of compound 9.

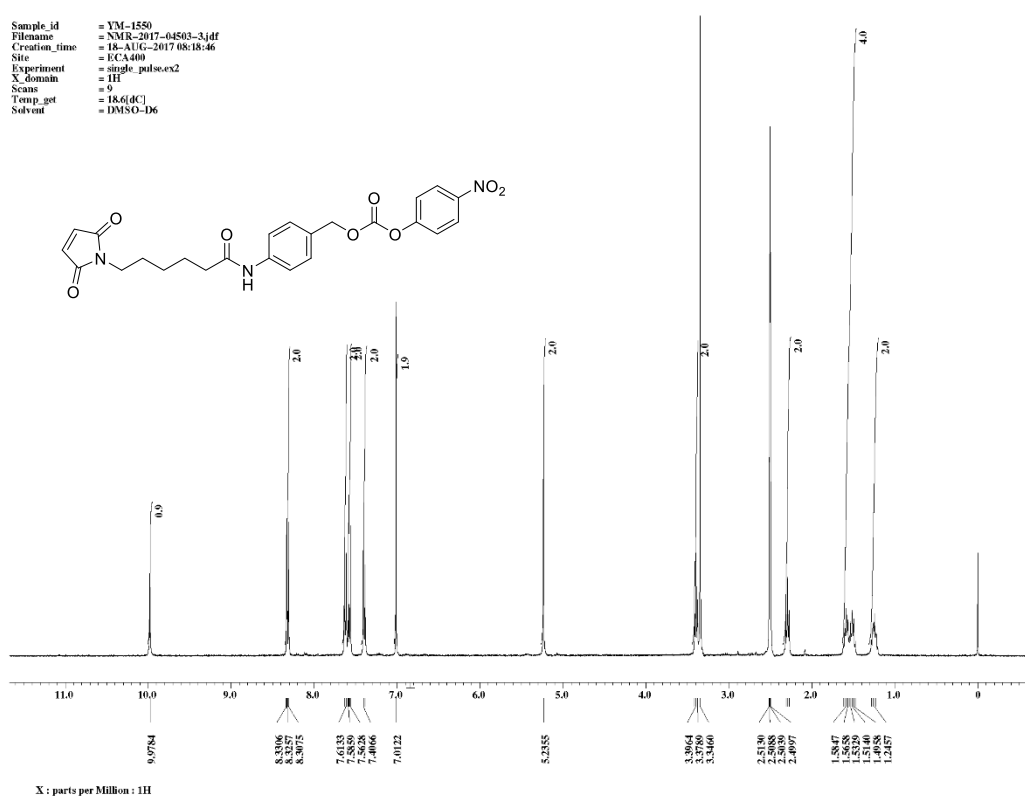Figure S17. The <sup>1</sup>H-NMR spectrum of compound 10.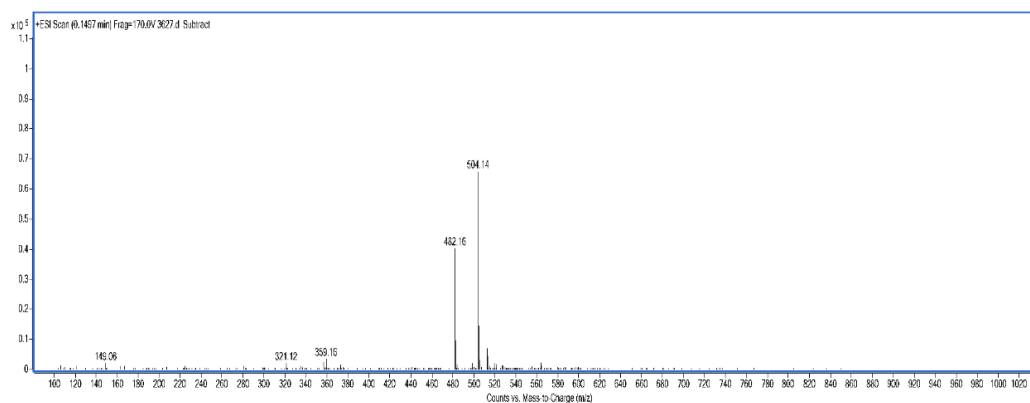

Figure S18. The ESI-MS spectrum of compound 10.

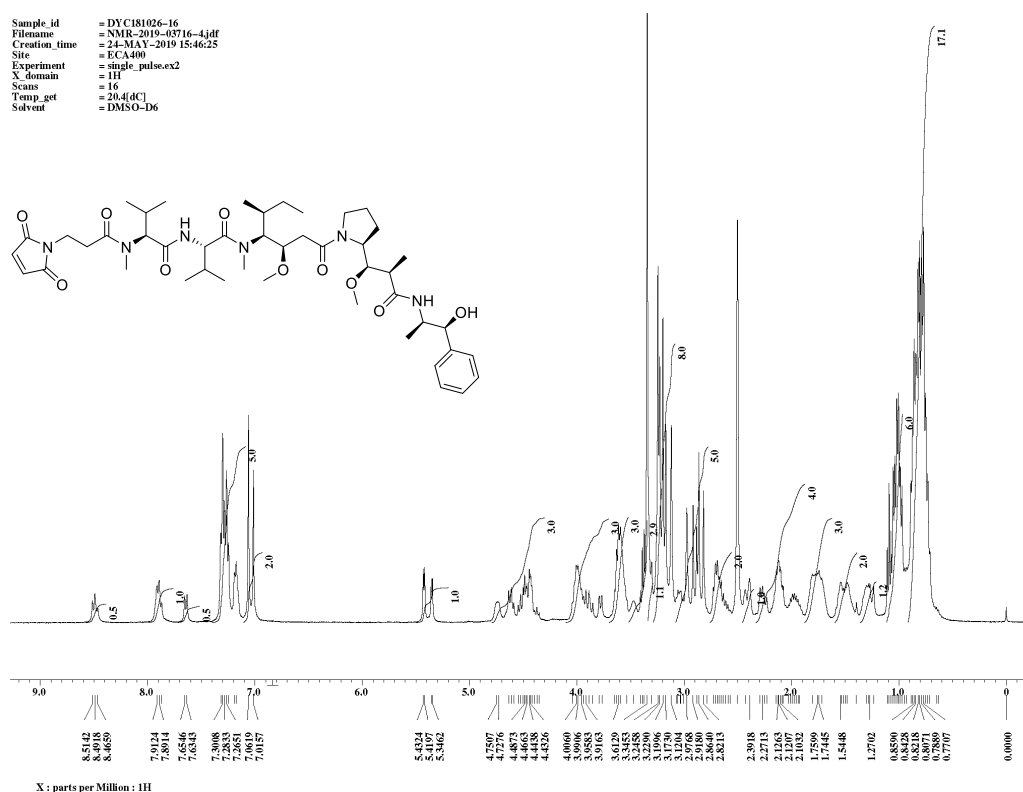

**Figure S19.** The  $^1\text{H}$ -NMR spectrum of compound **11**.

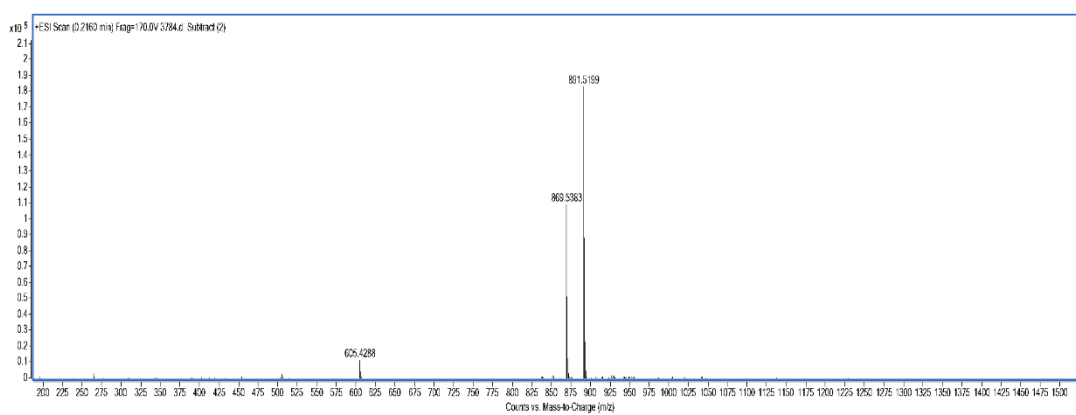

**Figure S20.** The HRMS spectrum of compound **11**.

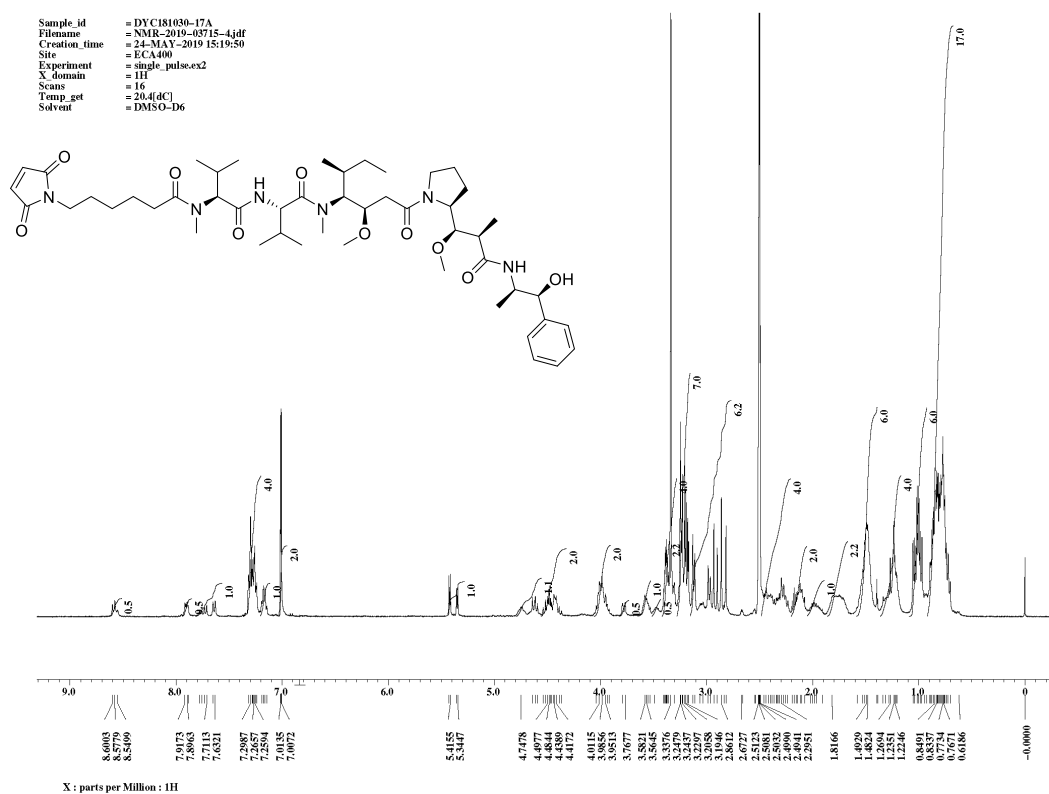Figure S21. The  $^1\text{H}$ -NMR spectrum of compound 12.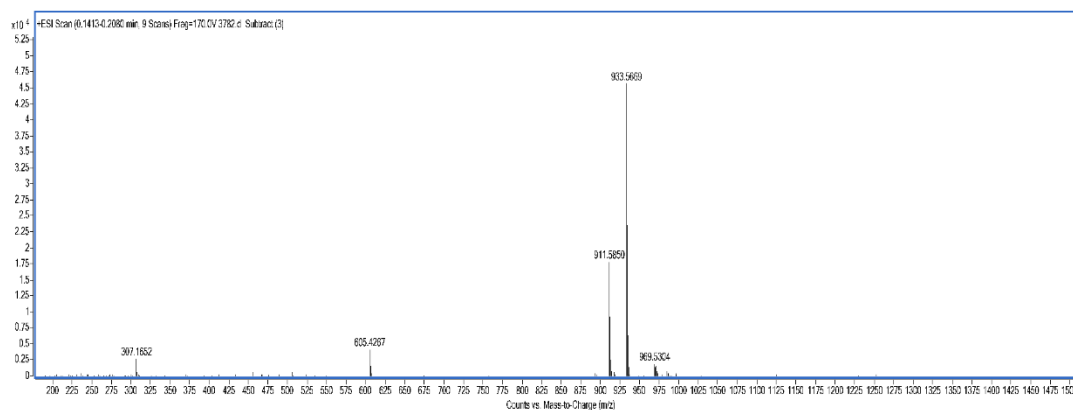

Figure S22. The HRMS spectrum of compound 12.

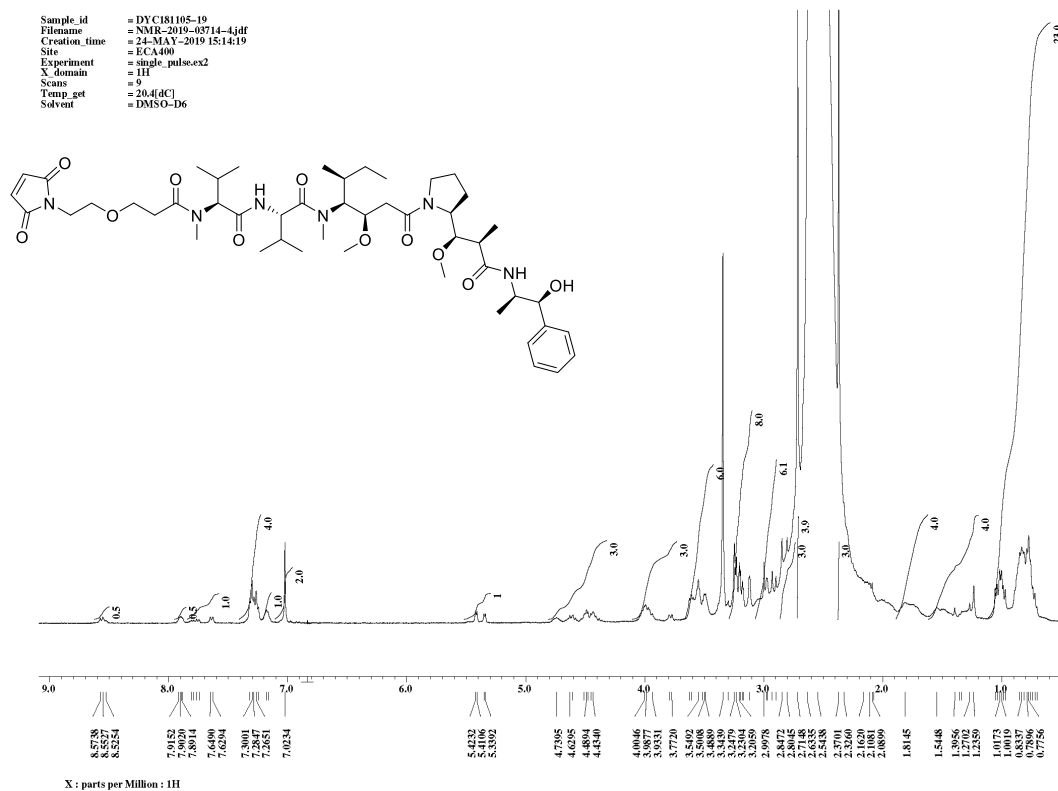Figure S23. The  $^1\text{H}$ -NMR spectrum of compound 13.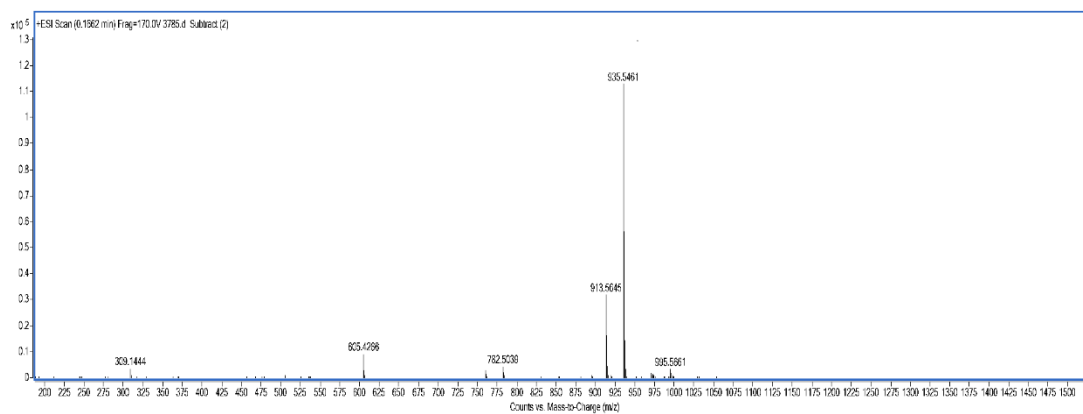

Figure S24. The HRMS spectrum of compound 13.

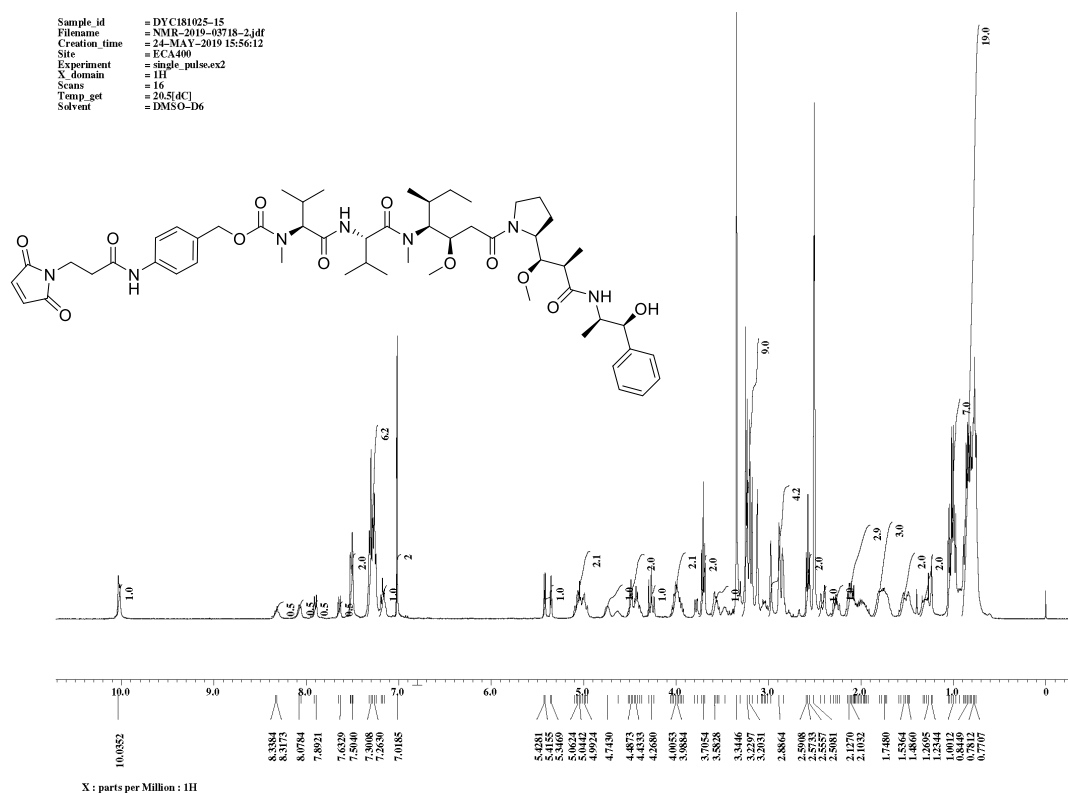Figure S25. The  $^1\text{H}$ -NMR spectrum of compound 14.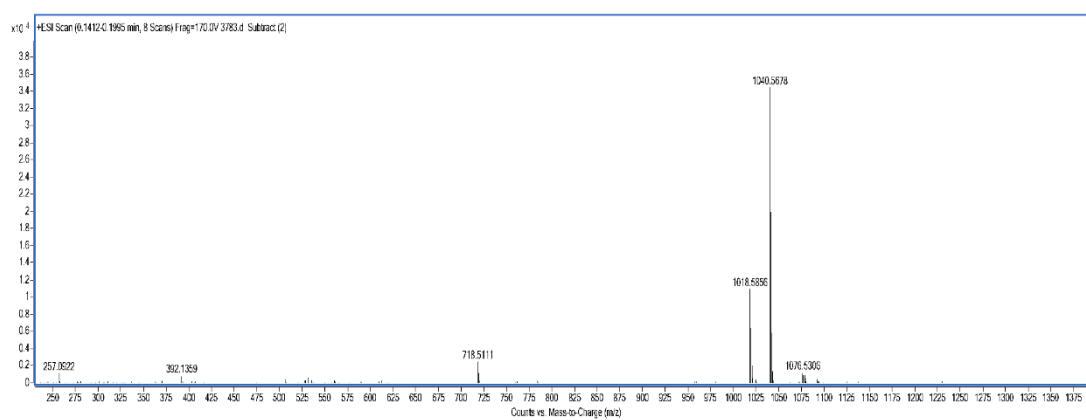

Figure S26. The HRMS spectrum of compound 14.

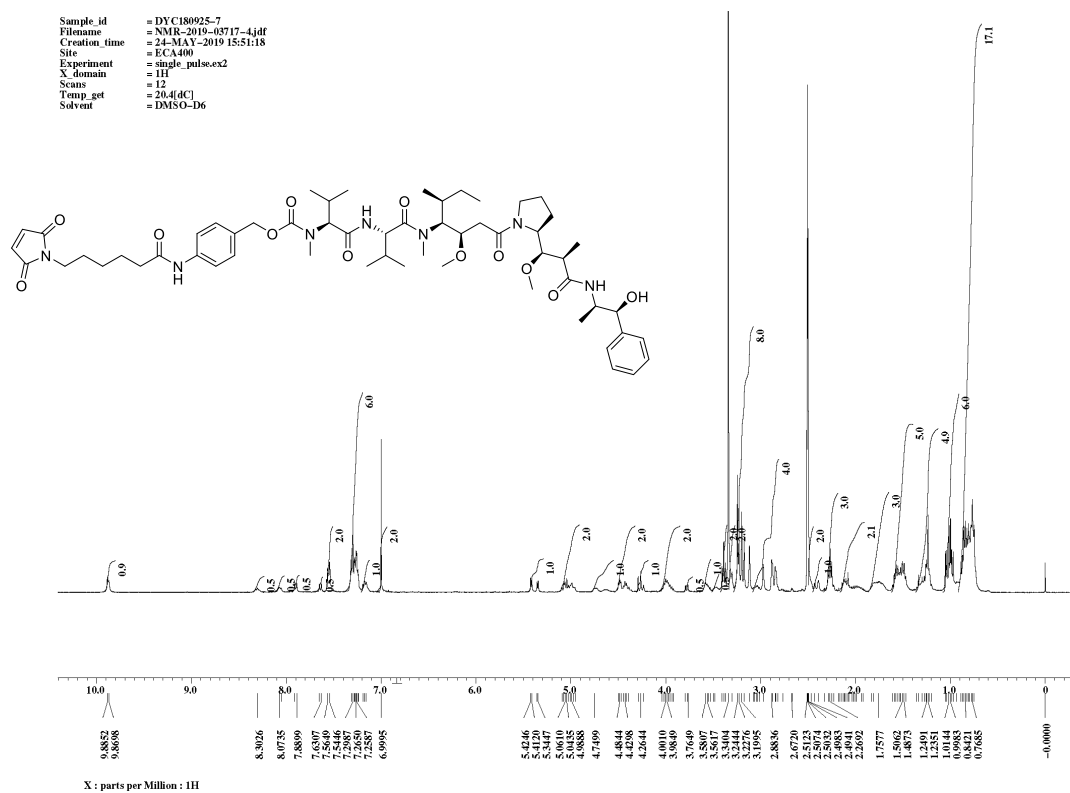Figure S27. The  $^1\text{H}$ -NMR spectrum of compound 15.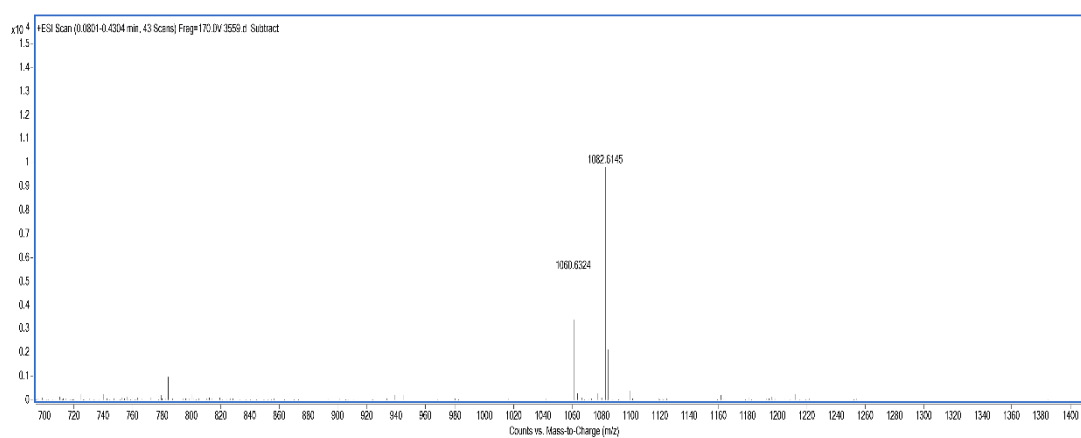

Figure S28. The HRMS spectrum of compound 15.

**Table S1.** Permeability prediction of MMAE and Cys-linker-MMAE conjugates.

| Compound | MlogP  | S + Peff (cm/s $\times 10^4$ ) | S + MDCK (cm/s $\times 10^7$ ) | Perm Cornea (cm/s $\times 10^7$ ) |
|----------|--------|--------------------------------|--------------------------------|-----------------------------------|
| Cys-11   | −2.931 | 0.176                          | 5.747                          | 10.399                            |
| Cys-12   | −2.464 | 0.190                          | 4.902                          | 11.843                            |
| Cys-13   | −3.299 | 0.168                          | 4.906                          | 10.573                            |
| Cys-14   | −2.533 | 0.162                          | 5.019                          | 12.262                            |
| Cys-15   | −2.093 | 0.181                          | 4.795                          | 13.842                            |
| MMAE     | 1.191  | 0.353                          | 21.818                         | 63.090                            |

MlogP: moriguchi model of octanol-water partition coefficient, larger logP values indicate higher lipophilicity; S + Peff: human effective jejunal permeability, larger S + Peff values indicate greater permeability and the predicted value for membrane permeable molecules is usually  $>0.25$ ; S + MDCK: apparent MDCK COS permeability, larger S + MDCK values also indicate greater permeability and the predicted value for membrane permeable molecules is usually  $>20$ ; Perm\_Cornea: permeability through rabbit cornea, larger Perm\_Cornea values indicate greater membrane permeability.

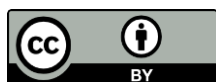

© 2020 by the authors. Licensee MDPI, Basel, Switzerland. This article is an open access article distributed under the terms and conditions of the Creative Commons Attribution (CC BY) license (<http://creativecommons.org/licenses/by/4.0/>).
